# Supplementary material for: Sucrose affects the developmental transition of rhizomes in Oryza longistaminata
Source: PubMed Central journal article supplement (PMC6488557; doi:10.1007/s10265-018-1033-x), 2018-05-08
Supplement: 10265_2018_1033_MOESM3_ESM.pdf [file 10265_2018_1033_MOESM3_ESM.pdf]

## **Electric supplementary materials**

### **Title:**

Sucrose affects the developmental transition of rhizomes in *Oryza longistaminata*

### **Authors:**

Kanako Bessho-Uehara<sup>1†</sup>, Jovano Erris Nugroho<sup>1†</sup>, Hirono Kondo<sup>1</sup>, Rosalyn B. Angeles-Shim<sup>1,2</sup> and Motoyuki Ashikari<sup>1\*</sup>

### **Journal:**

Journal of Plant Research

### **Corresponding author:**

Motoyuki Ashikari (Bioscience and Biotechnology Center, Furo-cho, Chikusa, Nagoya, Aichi 464-8601, Japan)

**Tel:** +81-52-789-5202

**Fax:** +81-52-789-5206

**e-mail:** [ashi@agr.nagoya-u.ac.jp](mailto:ashi@agr.nagoya-u.ac.jp)

### **Content:**

**Table S1**

**Figs. S1–S3**

| Table S1. Primers used in this paper |           |                          |
|--------------------------------------|-----------|--------------------------|
| Purpose                              | Name      | Sequence                 |
| qRT-PCR                              | OsSUT1_F  | ATCTCCATCGTCGTCCCTCA     |
|                                      | OsSUT1_R  | TTGGAGATCTTGGGCAGCAG     |
|                                      | GA20ox2_F | CGCCGCCTTCCAATTTT        |
|                                      | GA20ox2_R | AAGCCCAACCCAACCCA        |
|                                      | GA2ox3_F  | ATGGATGAACAGCCTCCAATAGTT |
|                                      | GA2ox3_R  | CGAGAAAATCAAAGGCAAGAGG   |
|                                      | PIN1_F    | AGCAAGCGTCCAGCCTTCAG     |
|                                      | PIN1_R    | CTCTCCCCACGCCGAACAG      |
|                                      | OsRGP1_F  | GGGAGAGATTACTTAAGCAAC    |
|                                      | OsRGP1_R  | CATTTAGCAACCAAAGCAC      |
|                                      | OsSUS1_F  | GGCTGAGACTCTGAAAGAGG     |
|                                      | OsSUS1_R  | CCTAGGAATGCAAAGCATC      |
|                                      | lvr2_F    | GTCGGCAAAGCAACACAG       |
|                                      | lvr2_R    | CGCAGCTGTATGCTGCTG       |

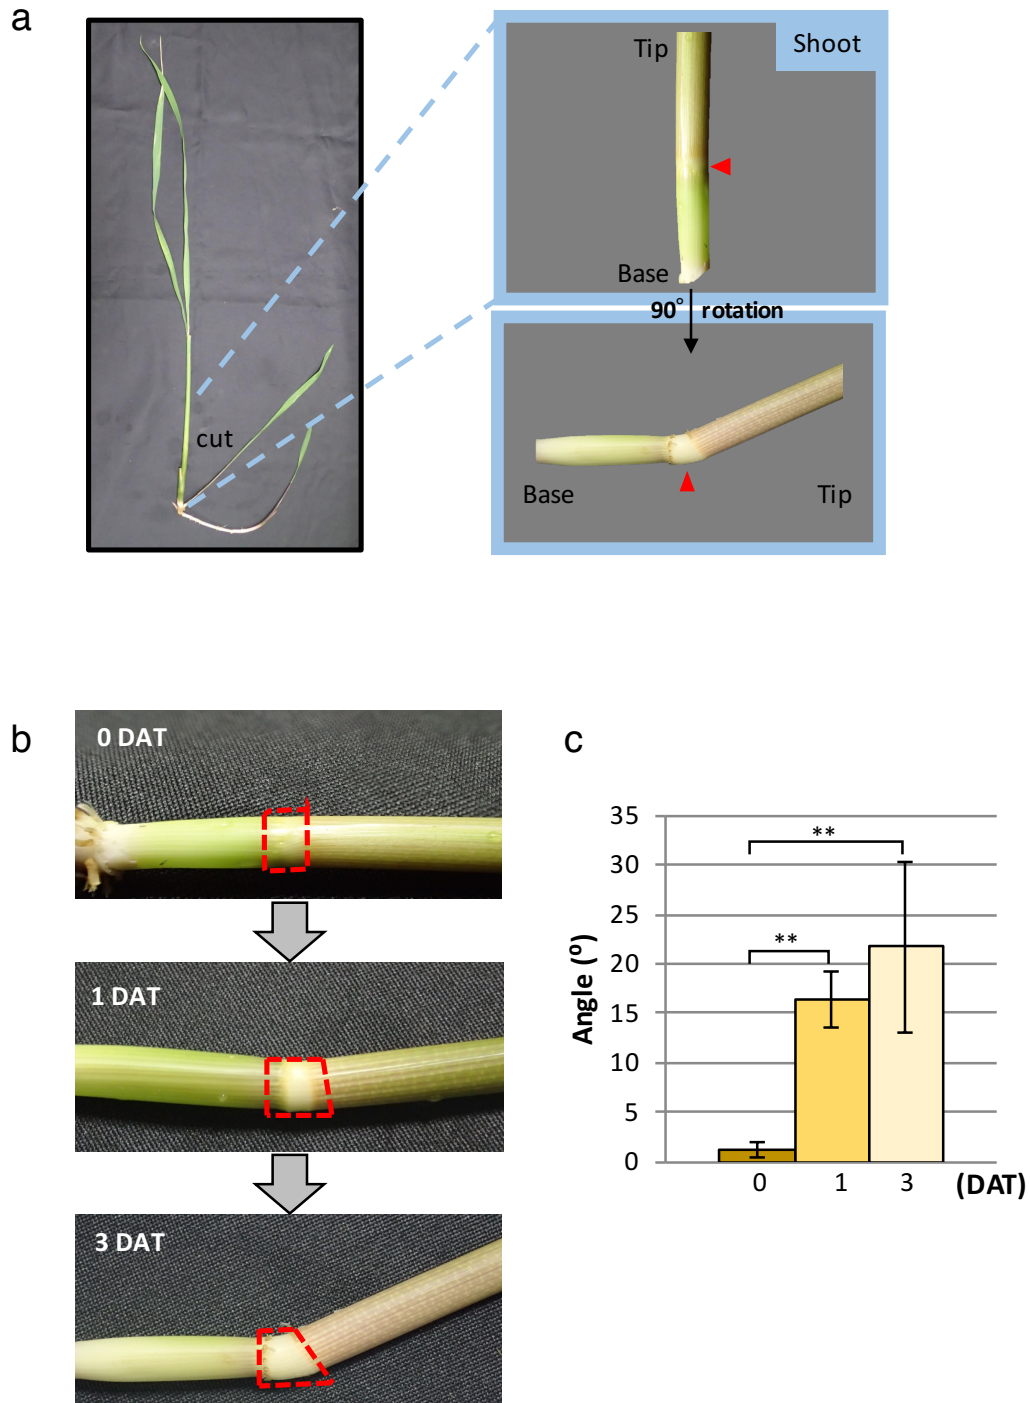

**Fig. S1 Gravitropic stimulation of *O. longistaminata* aerial stem.** (a) Illustration of how *O. longistaminata* aerial stem was excised and orientated to lie onto its side. Red triangle indicates pulvinus on aerial stem. (b) Representative pictures of stem bending; red dotted lines highlight pulvinus. DAT: days after treatment (c) The change of angle in aerial stem by negative gravitropism. Graph shows the mean of  $n=6$  plants and error bars indicate  $\pm$ SD. Significant difference were detected by student t-test and  $**p \leq 0.01$ .

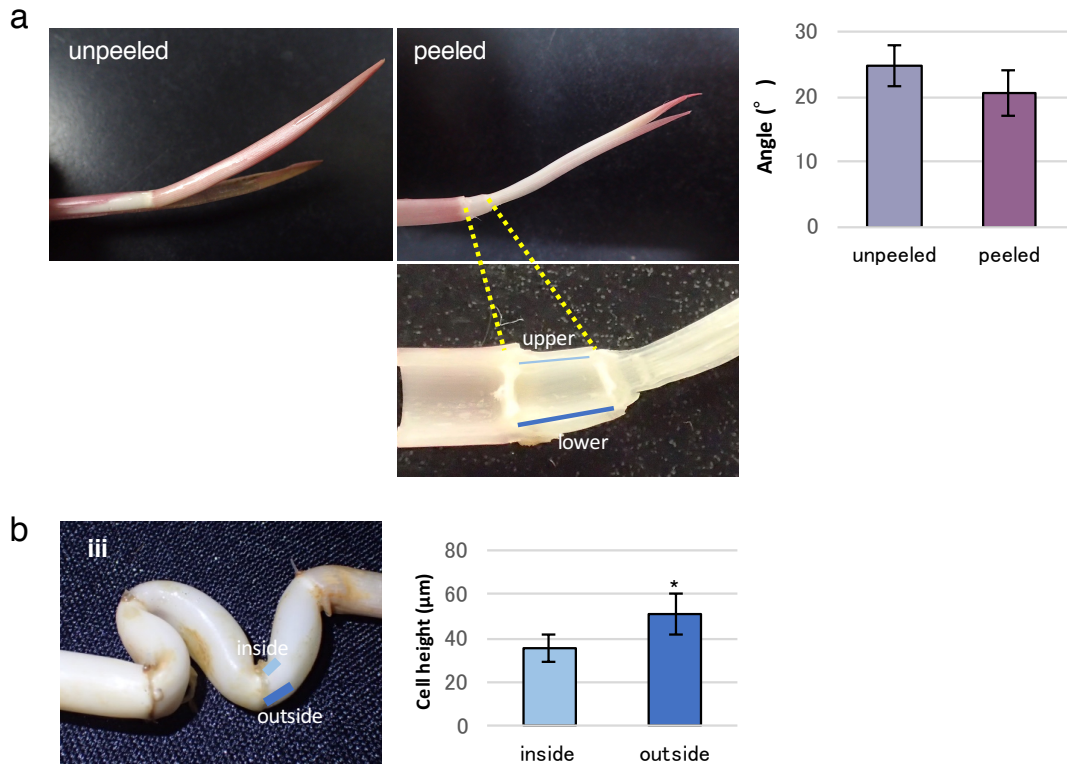

**Fig. S2 Rhizome bending initiated at the internode.** (a) The rhizome tip pictures unpeeled or peeled of scale leaves around 6th node from the base. Magnified picture shows the longitudinal section of the internode, with the upper part of the internode evidently shorter than the lower part. The graph shows the bending angle at this point from 5 samples. (b) A similar picture is depicted in Fig. 2b (iii). A graph shows the cell height from 20 cells of 3 samples. Error bars indicate  $\pm$ SD. Significant difference was detected by student t-test, \*  $p < 0.05$ .

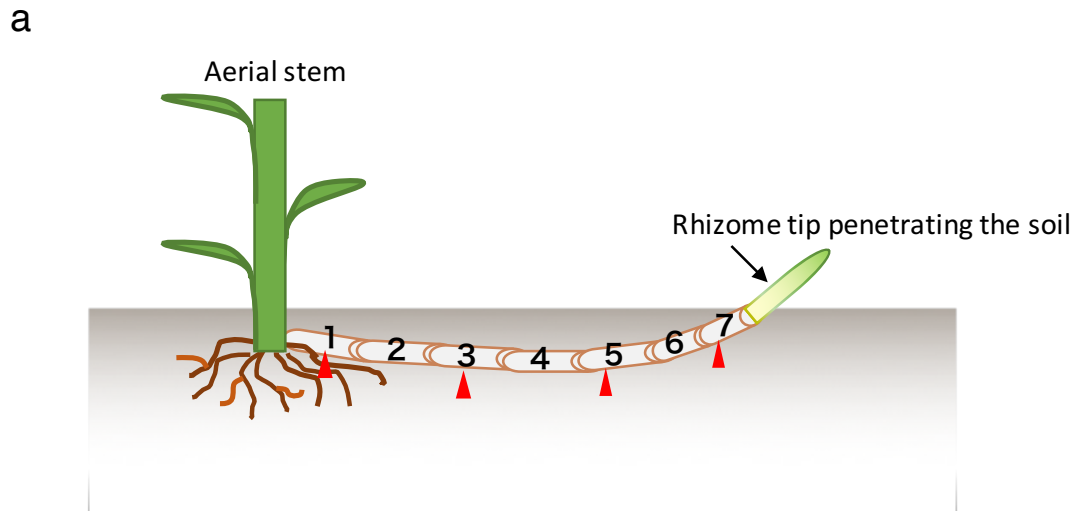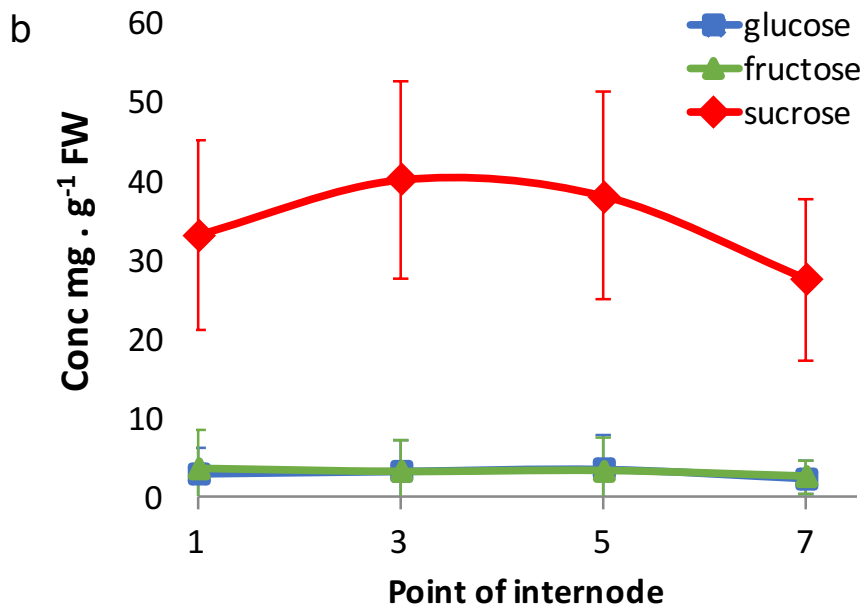

**Fig. S3** Amount of sugar in *O. longistaminata* rhizome that penetrates the soil surface. (a) Illustration of rhizome sampling points. The numbers pointed by red triangle indicate sampling internodes (1st, 3rd, 5th, 7th) in the rhizome. (b) Concentration of sucrose, glucose and fructose along the rhizomes. Error bars indicate  $\pm$ SD for 5 biological replicates.
